# Supplementary material for: miRNA-150_R-1 mediates the HIF-1/ErbB signaling pathway to regulate the adhesion of endometrial epithelial cells in cows experiencing retained placenta
Source: Front Vet Sci. 2022 Oct 17;9:1037880. doi: 10.3389/fvets.2022.1037880 (PMC9619212; doi:10.3389/fvets.2022.1037880)
Supplement: Supplementary file 2 [file Table_2.XLSX]

## Sheet: Table S1
Table S2. Overview of reads from raw data to clean sequences of miRNAs.
Libraries	Type	NC_1		NC_2		NC_3		RP_1		RP_2		RP_3
		Total (%)	Unique (%)	Total (%)	Unique (%)	Total (%)	Unique (%)	Total (%)	Unique (%)	Total (%)	Unique (%)	Total (%)	Unique (%)
Raw reads	NA	9910866(100.00)	307149(100.00)	9480570(100.00)	280963(100.00)	10543764(100.00)	310022(100.00)	10479549(100.00)	196433(100.00)	9913568(100.00)	189328(100.00)	9682774(100.00)	187309(100.00)
3ADT&length filter	Sequence type	674672(6.81)	168564(54.88)	614069(6.48)	150132(53.430	614807(5.83)	162467(52.40)	477529(4.56)	110461(56.23)	436024(4.40)	103579(54.71)	422260(4.36)	106299(56.75)
Junk reads	Sequence type	3582(0.04)	970(0.32)	4016(0.04)	981(0.35)	4657(0.04)	1211(0.39)	3273(0.03)	816(0.42)	3089(0.03)	788(0.42)	3168(0.03)	836(0.45)
Rfam	RNA class	76498(0.77)	1227(0.40)	73179(0.77)	1248(0.44)	80724(0.77)	1321(0.43)	75972(0.72)	1262(0.64)	70097(0.71)	1220(0.64)	66973(0.69)	1129(0.60)
mRNA	RNA class	93966(0.95)	2106(0.69)	88032(0.93)	2051(0.73)	99622(0.94)	2238(0.72)	86652(0.83)	1423(0.72)	84224(0.85)	1410(0.74)	76179(0.79)	1296(0.69)
Repeats	RNA class	32740(0.33)	1233(0.40)	31112(0.33)	1228(0.44)	34776(0.33)	1319(0.43)	19547(0.19)	847(0.43)	18931(0.19)	826(0.44)	17018(0.18)	753(0.40)
rRNA	RNA class	8243(0.08)	192(0.06)	8208(0.09)	210(0.07)	9130(0.09)	224(0.07)	6409(0.06)	196(0.10)	6204(0.06)	189(0.10)	5618(0.06)	182(0.10)
tRNA	RNA class	2330(0.02)	161(0.05)	2343(0.02)	153(0.05)	2648(0.03)	165(0.05)	3218(0.03)	182(0.09)	3192(0.03)	187(0.10)	2798(0.03)	164(0.09)
snoRNA	RNA class	7409(0.07)	427(0.14)	7307(0.08)	445(0.16)	8250(0.08)	461(0.15)	7265(0.07)	420(0.21)	7212(0.07)	416(0.22)	6164(0.06)	370(0.20)
snRNA	RNA class	2938(0.03)	136(0.04)	2780(0.03)	125(0.04)	2996(0.03)	131(0.04)	2744(0.03)	118(0.06)	2591(0.03)	112(0.06)	2122(0.02)	96(0.05)
other Rfam RNA	RNA class	55578(0.56)	311(0.10)	52541(0.55)	315(0.11)	57700(0.55)	340(0.11)	56336(0.54)	346(0.18)	50898(0.51)	316(0.17)	50271(0.52)	317(0.17)
Clean reads	Sequence type	9054274(91.36)	134109(43.66)	8693605(91.70)	126373(44.98)	9735750(92.34)	142598(46.00)	9832107(93.82)	82397(41.95)	9316198(93.97)	82259(43.45)	9110569(94.09)	77692(56.75)
NC: fetal membranes of normal discharge, RP: retained placenta.
3ADT&length filter: reads removed due to 3ADT not found and length with <18 and >26 nt were remove.
Junk reads: junk: >=2N, >=7A, >=8C, >=6G, >=7T, >=10Dimer, >=6Trimer, or >=5Tetramer.
Rfam: collection of many common non-coding RNA families except micro RNA; http://rfam.janelia.org.
Repeats: prototypic sequences representing repetitive DNA from different eukaryotic species; http://www.girinst.org/repbase.
Notes: there is overlap in mapping of reads with rRNA, tRNA, snRNA, snoRNA and repeats.
The values in the paranthesis represent the percentage of the total reads.
